# Supplementary material for: Mild replication stress causes premature centriole disengagement via a sub-critical Plk1 activity under the control of ATR-Chk1
Source: PubMed Central journal article supplement (PMC10541884; doi:10.1038/s41467-023-41753-1), 2023-09-29
Supplement: 41467_2023_41753_MOESM3_ESM.pdf [file 41467_2023_41753_MOESM3_ESM.pdf]

## **Description of Additional Supplementary Files**

### **File name: Supplementary Movie 1**

Description: Live-cell imaging of hTERT-RPE1 stably expressing EB3-GFP and H2B-mCherry and treated with DMSO control. Every image was captured at an interval of 3 m. The movie is shown at 5 frames per second (fps). Scale bars, 5  $\mu\text{m}$ .

### **File name: Supplementary Movie 2**

Description: Live-cell imaging of hTERT-RPE1 stably expressing EB3-GFP and H2B-mCherry and treated with Aphidicolin. Every image was captured at an interval of 3 m. The movie is shown at 5 frames per second (fps). Scale bars, 5  $\mu\text{m}$ .

### **File name: Supplementary Movie 3**

Description: Live-cell imaging of hTERT-RPE1 stably expressing EB3-GFP and H2B-mCherry and treated with Wee1i-1. Every image was captured at an interval of 3 m. The movie is shown at 5 frames per second (fps). Scale bars, 5  $\mu\text{m}$ .

### **File name: Supplementary Movie 4**

Description: Live-cell imaging of hTERT-RPE1 stably expressing EB3-GFP and H2B-mCherry and treated with Wee1i-2. Every image was captured at an interval of 3 m. The movie is shown at 5 frames per second (fps). Scale bars, 5  $\mu\text{m}$ .

### **File name: Supplementary Movie 5**

Description: Live-cell imaging of hTERT-RPE1 stably expressing EB3-GFP and H2B-mCherry and treated with Aphidicolin and Wee1i-1. Every image was captured at an interval of 3 m. The movie is shown at 5 frames per second (fps). Scale bars, 5  $\mu\text{m}$ .

### **File name: Supplementary Movie 6**

Description: Live-cell imaging of hTERT-RPE1 stably expressing EB3-GFP and H2B-mCherry and treated with Aphidicolin and Wee1i-2. Every image was captured at an interval of 3 m. The movie is shown at 5 frames per second (fps). Scale bars, 5  $\mu\text{m}$ .
